# Supplementary material for: Conservation Genomics of the Declining North American Bumblebee Bombus terricola Reveals Inbreeding and Selection on Immune Genes
Source: Front Genet. 2018 Aug 10;9:316. doi: 10.3389/fgene.2018.00316 (PMC6095975; doi:10.3389/fgene.2018.00316)
Supplement: Supplementary file 3 [file Table_3.xlsx]

## Sheet: Sheet1
# Apis-mellifera-Honeybee-putative-immune-related-genes-extended-list-OGS1-OGS3-FBgn
#
# "Ryabov EV, Wood GR, Fannon JM, Moore JD, Bull JC, Chandler D, Mead A, Burroughs N, Evans DJ. (2014) A virulent strain of deformed wing virus (DWV) of honeybees (Apis mellifera) prevails after Varroa destructor-mediated, or in vitro, transmission. PLoS Pathog. 2014 Jun 26;10(6):e1004230. doi: 10.1371/journal.ppat.1004230."
# "Honeybee immune-related genes included those described in Evans et al 2006 Insect Molecular Biology 15: 645_656, or the honeybee homologues of the Drosophila melanogaster genes associated with Gene Ontology Biological Process term ""Immune System Process"", GO:0002376. "
#
# http://www.plospathogens.org/article/info%3Adoi%2F10.1371%2Fjournal.ppat.1004230
#
Apis mellifera OGS1 (2008 version)	Apis mellifera OGS3.1 BEEBASE	FBgn ortholog	Gene Product	GO term / Pathway
GB10023	GB52350	FBgn0036448	myopic	Toll_pathway_Toll signaling pathway ; GO:0008063 and children
GB10539	GB54845	FBgn0026318	TNF-receptor-associated factor 6	Toll_pathway_Toll signaling pathway ; GO:0008063 and children
GB10655	GB44055	FBgn0000250	cactus	Toll_pathway_Toll signaling pathway ; GO:0008063 and children
GB11090	GB47167	FBgn0026318	TNF-receptor-associated factor 6	Toll_pathway_Toll signaling pathway ; GO:0008063 and children
GB11883	GB53302	FBgn0000250	cactus	Toll_pathway_Toll signaling pathway ; GO:0008063 and children
GB12279	GB55279	FBgn0028990	Serpin 27A	Toll_pathway_Toll signaling pathway ; GO:0008063 and children
GB12344	GB51498	FBgn0033402	Myd88	Toll_pathway_Toll signaling pathway ; GO:0008063 and children
GB13429	GB47680	FBgn0022787	Helicase 89B	Toll_pathway_Toll signaling pathway ; GO:0008063 and children
GB13503	GB52103	FBgn0003495	spatzle	Toll_pathway_Toll signaling pathway ; GO:0008063 and children
GB13520	GB44185	FBgn0000250	cactus	Toll_pathway_Toll signaling pathway ; GO:0008063 and children
GB13742	GB40654	FBgn0260632	dorsal	Toll_pathway_Toll signaling pathway ; GO:0008063 and children
GB13922	GB41067	FBgn0010269	Downstream of raf1	Toll_pathway_Toll signaling pathway ; GO:0008063 and children
GB13935	GB49466	FBgn0261988	G protein-coupled receptor kinase 2	Toll_pathway_Toll signaling pathway ; GO:0008063 and children
GB14810	GB53713	FBgn0022787	Helicase 89B	Toll_pathway_Toll signaling pathway ; GO:0008063 and children
GB15273	GB48707	FBgn0024222	immune response deficient 5	Toll_pathway_Toll signaling pathway ; GO:0008063 and children
GB15684	GB51427	FBgn0003882	tube	Toll_pathway_Toll signaling pathway ; GO:0008063 and children
GB15688	GB52631	FBgn0003495	spatzle	Toll_pathway_Toll signaling pathway ; GO:0008063 and children
GB15714	GB43157	FBgn0036448	myopic	Toll_pathway_Toll signaling pathway ; GO:0008063 and children
GB16281	GB45171	FBgn0010602	lesswright	Toll_pathway_Toll signaling pathway ; GO:0008063 and children
GB16397	GB49344	FBgn0010441	pelle	Toll_pathway_Toll signaling pathway ; GO:0008063 and children
GB16970	GB44935	FBgn0025574	Pellino	Toll_pathway_Toll signaling pathway ; GO:0008063 and children
GB17879	GB51741	FBgn0030310	Peptidoglycan recognition protein SA	Toll_pathway_Toll signaling pathway ; GO:0008063 and children
GB18520	GB50418	FBgn0262473	Toll	Toll_pathway_Toll signaling pathway ; GO:0008063 and children
GB19537	GB44031	FBgn0260632	dorsal	Toll_pathway_Toll signaling pathway ; GO:0008063 and children
MyD88	GB51498	FBgn0033402	Myd88	Toll_pathway_Toll signaling pathway ; GO:0008063 and children
GB10640	GB48399	FBgn0029114	Toll / Tollo	Toll_pathway_Toll signaling pathway ;
GB13677	GB46708	FBgn0031114	cactin	Toll_pathway_Toll signaling pathway ;
GB14044	GB55007	FBgn0030051	persephone-PSH Serine Protease Immune Response Integrator	Toll_pathway_Toll signaling pathway ;
GB14609	GB48662	FBgn0004364	Toll	Toll_pathway_Toll signaling pathway ;
GB14720	GB42451	FBgn0086657	Mik2	Toll_pathway_Toll signaling pathway ;
GB15177	GB43456	FBgn0034476	Toll	Toll_pathway_Toll signaling pathway ;
GB15606	GB43914	FBgn0024846	0	Toll_pathway_Toll signaling pathway ;
GB16299	GB48426	FBgn0029114	Toll	Toll_pathway_Toll signaling pathway ;
GB16472	GB48820	FBgn0028985	NEC LIKE	Toll_pathway_Toll signaling pathway ;
GB17012	GB46970	not found	NEC LIKE	Toll_pathway_Toll signaling pathway ;
GB17781	GB48396	FBgn0036494	Toll	Toll_pathway_Toll signaling pathway ;
GB17927	GB49441	FBgn0003450	Toll-Pathway_persephone-Serine protease--Extracellular-cSP10	Toll_pathway_Toll signaling pathway ;
GB17936	GB55933	FBgn0039532		Toll_pathway_Toll signaling pathway ;
GB17961	GB41158	not found	Tollip	Toll_pathway_Toll signaling pathway ;
GB17975	GB40699	FBgn0029114	Tollo	Toll_pathway_Toll signaling pathway ;
GB18032	GB42472	not found	dorsal	Toll_pathway_Toll signaling pathway ;
GB19066	GB44032	not found	doesal	Toll_pathway_Toll signaling pathway ;
GB19582	GB54611	FBgn0028984	NEC-like	Toll_pathway_Toll signaling pathway ;
GB11563	GB45417	FBgn0041182	TEPB	TEP - Thioester-containing protein
GB12605	GB42455	FBgn0041182	TEP7	TEP - Thioester-containing protein
GB18789	GB48204	FBgn0020240	TEPA	TEP - Thioester-containing protein
GB10222	GB41097	not found	SP18	serine proteases
GB10646	GB41409	FBgn0036436	SP4	serine proteases
GB10758	GB44146	FBgn0034709	0	serine proteases
GB10943	GB49946	FBgn0011653	cSPH41	serine proteases
GB11297	GB47402	not found	SP31	serine proteases
GB11298	GB52598	FBgn0032213	cSPH42	serine proteases
GB11511	GB40138	not found	SP32	serine proteases
GB11552	GB48510	not found	SP34	serine proteases
GB11588	GB50026	not found	SP27	serine proteases
GB11698	GB49552	not found	cSP3	serine proteases
GB12253	GB50586	FBgn0003319	SP16	serine proteases
GB12300	GB41399	FBgn0042098	SP5	serine proteases
GB12379	GB54517	not found	SP48	serine proteases
GB13019	GB54775	FBgn0030027	SPH56	serine proteases
GB13263	GB52185	not found	SP40	serine proteases
GB13397	GB41410	not found	SPH51	serine proteases
GB13489	GB44120	FBgn0050375	SP28	serine proteases
GB13791	GB48079	FBgn0015316	SP22	serine proteases
GB14001	GB53354	FBgn0032402	cSPH50	serine proteases
GB14077	GB54762	FBgn0033362	cSP6	serine proteases
GB14233	GB51631	not found	SP24	serine proteases
GB14247	GB45700	FBgn0000533	cSP2	serine proteases
GB14309	GB50650	not found	cSP33	serine proteases
GB14366	GB52597	not found	cSPH39	serine proteases
GB14603	GB40137	FBgn0026250	SP17	serine proteases
GB14644	GB41407	not found	SP29	serine proteases
GB14654	GB41408	FBgn0039272	SP11	serine proteases
GB14774	GB48081	not found	SP47	serine proteases
GB15254	GB50290	not found	cSPH55	serine proteases
GB15317	GB52191	FBgn0051217	SP49	serine proteases
GB15453	GB47933	not found	SP44	serine proteases
GB15640	GB50164	not found	SP13	serine proteases
GB15702	GB48471	not found	SPH53	serine proteases
GB15980	GB42804	not found	SPH54	serine proteases
GB16021	GB45565	FBgn0038481	SP35	serine proteases
GB16038	GB48080	not found	SPH57	serine proteases
GB16147	GB45701	FBgn0027930	cSP1	serine proteases
GB16214	GB56027	FBgn0036287	SP38	serine proteases
GB16220	GB44149	FBgn0038727	cSP21	serine proteases
GB16367	GB40831	FBgn0038211	SP46	serine proteases
GB17145	GB46726	FBgn0051728	cSP7	serine proteases
GB17345	GB41710	FBgn0036612	SPH19	serine proteases
GB17654	GB43369	not found	SP45	serine proteases
GB18178	GB41178	FBgn0038447	SP15	serine proteases
GB18450	GB52706	FBgn0033365	cSP26	serine proteases
GB18530	GB50314	not found	SP43	serine proteases
GB18732	GB49441	not found	SP9	serine proteases
GB18944	GB46203	FBgn0037627	SPH37	serine proteases
GB19292	GB45336	not found	SPH52	serine proteases
GB19590	GB40567	FBgn0002926	SP20	serine proteases
GB19719	GB50648	FBgn0085379	cSP25	serine proteases
GB19846	GB50761	FBgn0038485	SP36	serine proteases
GB19856	GB40926	FBgn0051265	SP12	serine proteases
GB10506	GB52097	FBgn0058006	AmSCR-B1	Scav. Receptor A
GB11743	GB45986	FBgn0035290	AmSCR-B2	Scav. Receptor A
GB12378	GB50865	not found	AmSCR-B3	Scav. Receptor A
GB12538	GB50482	FBgn0023479	GRAAL/Tequila-like	Scav. Receptor A
GB12830	GB50454	not found	AmSCR-B4	Scav. Receptor A
GB13360	GB49476	FBgn0034660	lox2-like	Scav. Receptor A
GB13813	GB49363	FBgn0027562	AmSCR-B5	Scav. Receptor A
GB14314	GB53014	not found	AmSCR-B6	Scav. Receptor A
GB15549	GB48343	not found	AmSCR-B7	Scav. Receptor A
GB16388	GB40306	not found	AmSCR-B8	Scav. Receptor A
GB19649	GB54246	FBgn0033192	Corin-like	Scav. Receptor A
GB19683	GB50866	FBgn0010435	AmSCR-B10	Scav. Receptor A
GB19916	GB44045	FBgn0015924	AmSCR-B9	Scav. Receptor A
GB19925	GB54506	FBgn0014033	AmSCR-C	Scav. Receptor A
GB18313	GB43738	FBgn0033367	PPO	PPO - melanization
GB18767	GB50013	FBgn0036891	PPOAct	PPO - melanization
GB10231	GB40163	FBgn0034539	CG11159	Lysozyme
GB15106	GB40163	FBgn0004431	Lysozyme X	Lysozyme
GB19988	GB47104	FBgn0025827		Lysozyme
GB10567	GB49149	FBgn0004647	Notch	JNK cascade ; GO:0007254
GB11373	GB45558	FBgn0010333	Rac1	JNK cascade ; GO:0007254
GB11819	GB47961	FBgn0024329	Mekk1	JNK cascade ; GO:0007254
gb12004	GB53318	FBgn0001291	Jun-related antigen	JNK cascade ; GO:0007254
GB12212	GB42049	FBgn0001297	kayak	JNK cascade ; GO:0007254
GB12587	GB49368	FBgn0014011	Rac2	JNK cascade ; GO:0007254
GB12838	GB43176	FBgn0015286	Ras-related protein	JNK cascade ; GO:0007254
GB13135	GB47431	FBgn0014020	Rho1	JNK cascade ; GO:0007254
GB14469	GB44237	FBgn0004636	Roughened	JNK cascade ; GO:0007254
GB14925	GB50631	FBgn0010341	Cdc42	JNK cascade ; GO:0007254
GB15424	GB53394	FBgn0003371	shaggy	JNK cascade ; GO:0007254
GB16401	GB56012	FBgn0000229	basket	JNK cascade ; GO:0007254
GB16764	GB44888	FBgn0033483	eiger	JNK cascade ; GO:0007254
GB17167	GB51894	FBgn0010303	hemipterous	JNK cascade ; GO:0007254
GB17813	GB49149	FBgn0004647	Notch	JNK cascade ; GO:0007254
GB17935	GB45540	FBgn0000097	anterior open	JNK cascade ; GO:0007254
GB20112	GB45657	FBgn0010341	Cdc42	JNK cascade ; GO:0007254
GB19901	GB44634	FBgn0243512		JNK cascade
GB11408	GB52985	FBgn0043884	multiple ankyrin repeats single KH domain	JAK-STAT cascade ; GO:0007259 and children
GB12007	GB40911	FBgn0003612	Suppressor of variegation 2-10	JAK-STAT cascade ; GO:0007259 and children
GB12159	GB42244	FBgn0043903	domeless	JAK-STAT cascade ; GO:0007259 and children
GB14092	GB42304	FBgn0001319	knot	JAK-STAT cascade ; GO:0007259 and children
GB16422	GB44594	FBgn0004864	hopscotch	JAK-STAT cascade ; GO:0007259 and children
GB18362	GB40911	FBgn0003612	Suppressor of variegation 2-10	JAK-STAT cascade ; GO:0007259 and children
GB18923	GB50020	FBgn0016917	Signal-transducer and activator of transcription protein at 92E	JAK-STAT cascade ; GO:0007259 and children
GB14250	GB51500	FBgn0085402		JAK-STAT cascade
GB18949	GB55283	FBgn0041184		JAK-STAT cascade
GB10026	GB44490	FBgn0031213		immune-related
GB11320	GB53101	FBgn0020305		immune-related
GB11902	GB45882	FBgn0003326		immune-related
GB12454	GB48687	not found		immune-related
GB12883	GB50507	not found		immune-related
GB13522	GB47208	FBgn0030018		immune-related
GB13979	GB50509	not found		immune-related
GB14645	GB50508	FBgn0243514		immune-related
GB14962	GB54664	FBgn0027594		immune-related
GB15645	GB45138	FBgn0030505		immune-related
GB17018	GB42358	FBgn0087011		immune-related
GB18324	GB46478	FBgn0052226		immune-related
GB19452	GB42685	not found		immune-related
GB20003	GB42082	FBgn0041780		immune-related
GB10009	GB50238	FBgn0003884	alpha-Tubulin at 84B	Immune system process (GO:0002376)
GB10069	GB51712	FBgn0261560	Thor	Immune system process (GO:0002376)
GB10124	GB46739	FBgn0013576	mustard	Immune system process (GO:0002376)
GB10171	GB55582	FBgn0261617	nejire	Immune system process (GO:0002376)
GB10274	GB52588	FBgn0010247		Immune system process (GO:0002376)
GB10471	GB45135	FBgn0028982	Spt6	Immune system process (GO:0002376)
GB10524	GB55808	FBgn0020306		Immune system process (GO:0002376)
GB10574	GB43216	FBgn0261547	Ephexin	Immune system process (GO:0002376)
GB10654	GB47452	FBgn0261797	Dynein heavy chain 64C	Immune system process (GO:0002376)
GB10667	GB50038	FBgn0001108	Glued	Immune system process (GO:0002376)
GB10718	GB53167	FBgn0085432		Immune system process (GO:0002376)
GB10863	GB41845	FBgn0036844	Mitogen-activated protein kinase phosphatase 3	Immune system process (GO:0002376)
GB10917	GB52158	FBgn0031975	Transglutaminase	Immune system process (GO:0002376)
GB10996	GB53462	FBgn0005630	longitudinals lacking	Immune system process (GO:0002376)
GB11052	GB43375	FBgn0040324	Ephrin	Immune system process (GO:0002376)
GB11073	GB53490	FBgn0005630	longitudinals lacking	Immune system process (GO:0002376)
GB11075	GB47732	FBgn0260936	scrawny	Immune system process (GO:0002376)
GB11202	GB49929	FBgn0002526	Laminin A	Immune system process (GO:0002376)
GB11241	GB45708	FBgn0031975	Transglutaminase	Immune system process (GO:0002376)
GB11364	GB47224	FBgn0000568	Ecdysone-induced protein 75B	Immune system process (GO:0002376)
GB11410	GB52999	FBgn0027932	A kinase anchor protein 200	Immune system process (GO:0002376)
GB11411	GB45655	FBgn0004837	Suppressor of Hairless	Immune system process (GO:0002376)
GB11474	GB45708	FBgn0031975	Transglutaminase	Immune system process (GO:0002376)
GB11564	GB43099	FBgn0028982	Spt6	Immune system process (GO:0002376)
GB11581	GB53848	FBgn0036752	Adenosine deaminase-related growth factor A	Immune system process (GO:0002376)
GB11734	GB41654	FBgn0013799	Deformed epidermal autoregulatory factor-1	Immune system process (GO:0002376)
GB11906	GB45526	FBgn0021895		Immune system process (GO:0002376)
GB11941	GB43092	FBgn0013762	Cyclin-dependent kinase 5	Immune system process (GO:0002376)
GB12005	GB42215	FBgn0004657	myospheroid	Immune system process (GO:0002376)
GB12053	GB50037	FBgn0003884	alpha-Tubulin at 84B	Immune system process (GO:0002376)
GB12064	GB50654	FBgn0032363	CG6509	Immune system process (GO:0002376)
GB12094	XP_006567597	FBgn0005630	longitudinals lacking	Immune system process (GO:0002376)
GB12173	GB54228	FBgn0029113	Smt3 activating enzyme 2	Immune system process (GO:0002376)
GB12207	GB54477	FBgn0003731	Epidermal growth factor receptor	Immune system process (GO:0002376)
GB12209	GB55970	FBgn0005655	mutagen-sensitive 209	Immune system process (GO:0002376)
GB12228	GB55583	FBgn0261617	nejire	Immune system process (GO:0002376)
GB12280	GB44534	FBgn0039141	spastin	Immune system process (GO:0002376)
GB12288	GB42607	FBgn0264294	Cytochrome b5	Immune system process (GO:0002376)
GB12298	GB48789	FBgn0032363	CG6509	Immune system process (GO:0002376)
GB12312	GB47313	FBgn0003261	Rm62	Immune system process (GO:0002376)
GB12357	GB42600	FBgn0036844	Mitogen-activated protein kinase phosphatase 3	Immune system process (GO:0002376)
GB12373	GB46510	FBgn0010247	Poly-(ADP-ribose) polymerase	Immune system process (GO:0002376)
GB12465	GB45757	FBgn0003896	tailup	Immune system process (GO:0002376)
GB12478	GB49992	FBgn0021895	yantar	Immune system process (GO:0002376)
GB12556	GB55472	FBgn0003205	Ras oncogene at 85D	Immune system process (GO:0002376)
GB12585	GB41629	FBgn0025936	Eph receptor tyrosine kinase	Immune system process (GO:0002376)
GB12639	GB55272	FBgn0011202	diaphanous	Immune system process (GO:0002376)
GB12643	GB55408	FBgn0030964	PDGF- and VEGF-related factor 1	Immune system process (GO:0002376)
GB12742	GB53016	FBgn0085407	PDGF- and VEGF-related factor 3	Immune system process (GO:0002376)
GB12839	GB46452	FBgn0000996	double parked	Immune system process (GO:0002376)
GB13057	GB40690	FBgn0264707	RhoGEF3	Immune system process (GO:0002376)
GB13109	GB44213	FBgn0014141	cheerio	Immune system process (GO:0002376)
GB13113	GB50397	FBgn0021873	Gef26	Immune system process (GO:0002376)
GB13159	GB53150	FBgn0263289	scribbled	Immune system process (GO:0002376)
GB13170	GB46539	FBgn0040068	vav	Immune system process (GO:0002376)
GB13192	GB49985	FBgn0259984		Immune system process (GO:0002376)
GB13202	GB40333	FBgn0040324	Ephrin	Immune system process (GO:0002376)
GB13381	GB52563	FBgn0000212	brahma	Immune system process (GO:0002376)
GB13405	GB54530	FBgn0031216	CG11376	Immune system process (GO:0002376)
GB13459	GB51481	FBgn0031464	Dual oxidase	Immune system process (GO:0002376)
GB13523	GB53472	FBgn0005630	longitudinals lacking	Immune system process (GO:0002376)
GB13567	GB41547	FBgn0259099	Doublecortin-domain-containing echinoderm-microtubule-associated protein ortholog	Immune system process (GO:0002376)
GB13582	GB54852	FBgn0032006	PDGF- and VEGF-receptor related	Immune system process (GO:0002376)
GB13642	GB41009	FBgn0031975	Transglutaminase	Immune system process (GO:0002376)
GB13665	GB49498	FBgn0038046	CG5641	Immune system process (GO:0002376)
GB13670	GB46338	FBgn0043550	Tetraspanin 68C	Immune system process (GO:0002376)
GB13747	GB47828	FBgn0011764		Immune system process (GO:0002376)
GB13819	GB51694	FBgn0003447	singed	Immune system process (GO:0002376)
GB13884	GB49904	FBgn0000490	decapentaplegic	Immune system process (GO:0002376)
GB13967	GB40759	FBgn0043841	virus-induced RNA 1	Immune system process (GO:0002376)
GB14060	GB48932	FBgn0260935	immune response deficient 1	Immune system process (GO:0002376)
GB14141	GB52278	FBgn0014141	cheerio	Immune system process (GO:0002376)
GB14169	GB50932	FBgn0003117	pannier	Immune system process (GO:0002376)
GB14289	GB51067	FBgn0082598	akirin	Immune system process (GO:0002376)
GB14441	GB56005	FBgn0026379	Pten	Immune system process (GO:0002376)
GB14446	GB44948	FBgn0259099	Doublecortin-domain-containing echinoderm-microtubule-associated protein ortholog	Immune system process (GO:0002376)
GB14487	GB44982	FBgn0010395	beta[nu] integrin	Immune system process (GO:0002376)
GB14518	GB55704	FBgn0026207	members only	Immune system process (GO:0002376)
GB14545	GB42785	FBgn0039702	Vacuolar protein sorting 16B	Immune system process (GO:0002376)
GB14602	GB43446	FBgn0040505		Immune system process (GO:0002376)
GB14619	GB42579	FBgn0262738	no receptor potential A	Immune system process (GO:0002376)
GB14763	GB53451	FBgn0005630	longitudinals lacking	Immune system process (GO:0002376)
GB14801	GB49927	FBgn0050420	Activating transcription factor-2	Immune system process (GO:0002376)
GB14813	GB42608	FBgn0264294	Cytochrome b5	Immune system process (GO:0002376)
GB14837	GB53251	FBgn0243511		Immune system process (GO:0002376)
GB14882	GB53826	FBgn0011766	E2F transcription factor	Immune system process (GO:0002376)
GB14945	GB53149	FBgn0263289	scribbled	Immune system process (GO:0002376)
GB15003	GB53487	FBgn0005630	longitudinals lacking	Immune system process (GO:0002376)
GB15155	GB48639	FBgn0004197	Serrate	Immune system process (GO:0002376)
GB15156	GB53491	FBgn0005630	longitudinals lacking	Immune system process (GO:0002376)
GB15281	GB55293	FBgn0260934	par-1	Immune system process (GO:0002376)
GB15447	GB45431	FBgn0014380	rho-like	Immune system process (GO:0002376)
GB15719	GB50640	FBgn0086899	Tousled-like kinase	Immune system process (GO:0002376)
GB15805	GB40436	FBgn0023167	Small ribonucleoprotein particle protein SmD3	Immune system process (GO:0002376)
gb16002	GB46338	FBgn0043550	Tetraspanin 68C	Immune system process (GO:0002376)
GB16114	GB54297	FBgn0021875	Zinc finger protein RP-8	Immune system process (GO:0002376)
GB16187	GB49505	FBgn0036980	RhoBTB	Immune system process (GO:0002376)
GB16356	GB49929	FBgn0002526	Laminin A	Immune system process (GO:0002376)
GB16396	GB41740	FBgn0021760	chromosome bows	Immune system process (GO:0002376)
GB16409	GB43185	FBgn0031537	sec5	Immune system process (GO:0002376)
GB16431	GB52721	FBgn0002576	lozenge	Immune system process (GO:0002376)
GB16457	GB45131	FBgn0003963	u-shaped	Immune system process (GO:0002376)
GB16508	GB49120	FBgn0003079	pole hole	Immune system process (GO:0002376)
GB16550	GB46540	FBgn0264294	Cytochrome b5	Immune system process (GO:0002376)
gb16573	GB49979	FBgn0043550	Tetraspanin 68C	Immune system process (GO:0002376)
GB16611	GB55798	FBgn0027491	Cdk5 activator-like protein	Immune system process (GO:0002376)
GB16613	GB40656	FBgn0011823	Pendulin	Immune system process (GO:0002376)
GB16680	GB51745	FBgn0037116	CG7158	Immune system process (GO:0002376)
GB16711	GB41850	FBgn0029167	Hemolectin	Immune system process (GO:0002376)
GB16736	GB48230	FBgn0050420	Activating transcription factor-2	Immune system process (GO:0002376)
GB16739	GB55914	FBgn0261524	licorne	Immune system process (GO:0002376)
GB16821	GB52515	FBgn0002526	Laminin A	Immune system process (GO:0002376)
GB16921	GB40741	FBgn0052133	ptip	Immune system process (GO:0002376)
GB17030	GB50930	FBgn0003507		Immune system process (GO:0002376)
GB17138	GB51962	FBgn0086902	kismet	Immune system process (GO:0002376)
GB17192	GB52973	FBgn0260866	defense repressor 1	Immune system process (GO:0002376)
GB17303	GB49949	FBgn0035850	Autophagy-specific gene 18	Immune system process (GO:0002376)
GB17556	GB54853	FBgn0032006	PDGF- and VEGF-receptor related	Immune system process (GO:0002376)
GB17628	GB46302	FBgn0262738	no receptor potential A	Immune system process (GO:0002376)
GB17687	GB55584	FBgn0016794	daughter of sevenless	Immune system process (GO:0002376)
GB17744	GB43216	FBgn0261547	Ephexin	Immune system process (GO:0002376)
GB17764	GB40429	FBgn0015790	Rab-protein 11	Immune system process (GO:0002376)
GB17971	GB51743	FBgn0000490	decapentaplegic	Immune system process (GO:0002376)
GB18039	GB45082	FBgn0015296	SHC-adaptor protein	Immune system process (GO:0002376)
GB18366	GB41829	FBgn0034366	Autophagy-specific gene 7	Immune system process (GO:0002376)
GB18378	GB43282	FBgn0004435	G protein alpha49B	Immune system process (GO:0002376)
GB18613	GB52625	FBgn0003118	pointed	Immune system process (GO:0002376)
GB18619	GB50333	FBgn0261592	Ribosomal protein S6	Immune system process (GO:0002376)
GB18627	GB48763	FBgn0000022	achaete	Immune system process (GO:0002376)
GB18643	GB47453	FBgn0261797	Dynein heavy chain 64C	Immune system process (GO:0002376)
GB18722	GB54764	FBgn0026404	Nedd2-like caspase	Immune system process (GO:0002376)
GB18769	GB55827	FBgn0015521	Ribosomal protein S21	Immune system process (GO:0002376)
GB18813	GB51292	FBgn0260642	Antennapedia	Immune system process (GO:0002376)
GB18882	GB42706	FBgn0011766		Immune system process (GO:0002376)
GB18918	GB49657	FBgn0004606	Zn finger homeodomain 1	Immune system process (GO:0002376)
GB18989	GB42321	FBgn0000543	ecdysoneless	Immune system process (GO:0002376)
GB19031	GB46056	FBgn0032209	Hand	Immune system process (GO:0002376)
GB19155	GB49172	FBgn0000541	Enhancer of bithorax	Immune system process (GO:0002376)
GB19160	GB45689	FBgn0038760	Mediator complex subunit 25	Immune system process (GO:0002376)
GB19168	GB47837	FBgn0011764	Dorsal switch protein 1	Immune system process (GO:0002376)
GB19246	GB44931	FBgn0028436	ECSIT	Immune system process (GO:0002376)
GB19301	GB47805	FBgn0043575	PGRP-SC2	Immune system process (GO:0002376)
GB19311	GB49159	FBgn0031145	Nuclear transport factor-2	Immune system process (GO:0002376)
GB19391	GB42685	FBgn0040323	Gram-negative bacteria binding protein 1	Immune system process (GO:0002376)
GB19423	GB45127	FBgn0028541	TM9SF4	Immune system process (GO:0002376)
GB19455	GB43567	FBgn0020377	Scavenger receptor class C, type II	Immune system process (GO:0002376)
GB19525	GB47743	FBgn0261854	atypical protein kinase C	Immune system process (GO:0002376)
GB19541	GB47201	FBgn0004657	myospheroid	Immune system process (GO:0002376)
GB19633	GB41547	FBgn0259099	Doublecortin-domain-containing echinoderm-microtubule-associated protein ortholog	Immune system process (GO:0002376)
GB19783	GB45615	FBgn0029167	Hemolectin	Immune system process (GO:0002376)
GB19857	GB46039	FBgn0003884	alpha-Tubulin at 84B	Immune system process (GO:0002376)
GB19881	GB42786	FBgn0027066	Eb1	Immune system process (GO:0002376)
GB19884	GB46165	FBgn0010389	heartless	Immune system process (GO:0002376)
GB19895	GB50933	FBgn0003117	pannier	Immune system process (GO:0002376)
GB19906	GB45031	FBgn0014179	glial cells missing	Immune system process (GO:0002376)
GB19961	GB42981	FBgn0040323	Gram-negative bacteria binding protein 1	Immune system process (GO:0002376)
GB19984	GB45510	FBgn0004009	wingless	Immune system process (GO:0002376)
GB20062	GB52563	FBgn0000212	brahma	Immune system process (GO:0002376)
GB20093	GB50397	FBgn0021873		Immune system process (GO:0002376)
maleszka5	GB40333	FBgn0040324	Ephrin	Immune system process (GO:0002376)
Robert14	GB42579	FBgn0262738	1-phosphatidylinositol 4,5-bisphosphate phosphodiesterase	Immune system process (GO:0002376)
TAMU:temp11:GroupUn_GroupUn.199:1-41940-PA	GB47743	FBgn0261854	atypical protein kinase C	Immune system process (GO:0002376)
GB11057	GB47454	FBgn0015247	Iap2	Imd-Pathway_peptidoglycan recognition protein signaling pathway ; GO:0061057
GB15371	GB47804	FBgn0037906	PGRP-LB	Imd-Pathway_peptidoglycan recognition protein signaling pathway ; GO:0061057
GB15528	GB44455	FBgn0034647	pirk	Imd-Pathway_peptidoglycan recognition protein signaling pathway ; GO:0061057
GB16425	GB45352	FBgn0020381	Dredd	Imd-Pathway_peptidoglycan recognition protein signaling pathway ; GO:0061057
GB17188	GB42500	FBgn0035976	PGRP-LC	Imd-Pathway_peptidoglycan recognition protein signaling pathway ; GO:0061057
GB17514	GB48951	FBgn0034068	casp	Imd-Pathway_peptidoglycan recognition protein signaling pathway ; GO:0061057
GB17683	GB45352	FBgn0020381	Dredd	Imd-Pathway_peptidoglycan recognition protein signaling pathway ; GO:0061057
GB18606	GB45648	FBgn0013983	imd	Imd-Pathway_peptidoglycan recognition protein signaling pathway ; GO:0061057
GB14664	GB48187	FBgn0026323	Tak1	Imd-Pathway
GB17106	GB49918	not found	IKKgamma-kenny	Imd-Pathway
GB18650	GB41606	FBgn0086358	Tab	Imd-Pathway
GB19498	GB45752	FBgn0000173	dUbc13	Imd-Pathway
GB30331	GB45352	not found		Imd-Pathway
GB30399	GB55968	not found		Imd-Pathway
GB10469	GB52343	FBgn0037107		IG Superfamily Genes
GB10912	GB53701	not found		IG Superfamily Genes
GB11115	GB47239	FBgn0029082		IG Superfamily Genes
GB11358	GB55483	FBgn0005666		IG Superfamily Genes
GB11807	GB53012	FBgn0010473		IG Superfamily Genes
GB11846	GB44650	FBgn0002968	Neuroglian	IG Superfamily Genes
GB11918	GB49767	not found		IG Superfamily Genes
GB12490	GB53013	FBgn0028482		IG Superfamily Genes
GB12933	GB40916	not found		IG Superfamily Genes
GB13261	GB44117	FBgn0000547		IG Superfamily Genes
GB14317	GB49171	FBgn0021764		IG Superfamily Genes
GB14520	GB46360	FBgn0000635		IG Superfamily Genes
GB14642	GB47977	FBgn0086906		IG Superfamily Genes
GB15344	GB41645	FBgn0000464		IG Superfamily Genes
GB15987	GB45774	FBgn0259141		IG Superfamily Genes
GB16060	GB46759	FBgn0037736		IG Superfamily Genes
GB30209	GB44159	not found		IG superfamily genes
GB11717	GB49260	FBgn0061354	CTL1	C-lectin domain
GB11792	GB55225	FBgn0001083	CTL6	C-lectin domain
GB11810	GB44210	FBgn0037240	CTL10	C-lectin domain
GB13808	GB43983	FBgn0030617	CTL12	C-lectin domain
GB14265	GB45248	FBgn0032180	CTL2	C-lectin domain
GB14382	GB51399	FBgn0013997	CTL8	C-lectin domain
GB14975	GB52656	FBgn0031629	CTL7	C-lectin domain
GB15050	GB47095	not found	CTL9	C-lectin domain
GB17330	GB40445	FBgn0031918	CTL5	C-lectin domain
GB18049	GB46626	FBgn0035199	CTL3	C-lectin domain
GB19013	GB43691	FBgn0038017	CTL11	C-lectin domain
GB20122	GB47938	FBgn0031879	CTL4	C-lectin domain
GB10036	GB47618	FBgn0010385	Defensin-2	Antimicrobial peptide - AMP
GB17538	GB51223	not found	Hymenoptaecin	Antimicrobial peptide - AMP
GB17782	GB47546	not found	Apidaecin	Antimicrobial peptide - AMP
GB18323	GB47318	not found	abaecin	Antimicrobial peptide - AMP
GB19392	GB41428	FBgn0010385	Defensin-1	Antimicrobial peptide - AMP
GB19468	GB53576	not found	apisimin	Antimicrobial peptide - AMP
GB10896	GB53625	FBgn0051997	Vago	Vago orthologue
GB12654	GB48208	FBgn0262739	AGO1 argonaute 1	RNAi
GB19288	GB48923	FBgn0034246	Dicer-2	RNAi
GB19389	GB49909	FBgn0250816	argonaute 3	RNAi
